# Supplementary material
Source: Springer Nature journal article supplement (https://www.springermedizin.de/resource/supplementary/12916_2014_958_MOESM6_ESM.pdf/9598914)
Supplement: MOESM6 [file 9598914]

| Study             | N Act | Mean Act | SD Act | N Plac | Mean Plac | SD Plac | RCI   | hg    | ci-   | ci+   | z      | p     | w      |
|-------------------|-------|----------|--------|--------|-----------|---------|-------|-------|-------|-------|--------|-------|--------|
| Ratner 2006       | 164   | 6.6      | 2.0    | 163    | 7.3       | 1.8     | -10.5 | -0.41 | -0.63 | -0.19 | -3.63  | 0.000 | 13.2%  |
| Graft 1996 Beclor | 112   | 1.5      | 3.7    | 104    | 2.4       | 3.7     | -37.5 | -0.24 | -0.51 | 0.03  | -1.77  | 0.076 | 8.8%   |
| Graft 1996 Mom    | 114   | 1.1      | 3.7    | 101    | 2.4       | 3.7     | -54.2 | -0.35 | -0.62 | -0.08 | -2.54  | 0.011 | 8.7%   |
| Hebert 1996       | 122   | 3.3      | 5.8    | 110    | 5.3       | 5.8     | -37.1 | -0.34 | -0.60 | -0.08 | -2.57  | 0.010 | 9.4%   |
| Gawchik 2003      | 122   | 7.2      | 2.8    | 123    | 7.7       | 2.9     | -6.5  | -0.17 | -0.43 | 0.08  | -1.37  | 0.172 | 10.1%  |
| Martin 2007       | 127   | 5.7      | 1.9    | 128    | 7.8       | 1.9     | -27.0 | -1.10 | -1.37 | -0.84 | -8.19  | 0.000 | 9.1%   |
| Kaiser 2007       | 151   | 6.1      | 1.9    | 148    | 7.8       | 2.0     | -22.7 | -0.91 | -1.15 | -0.67 | -7.49  | 0.000 | 11.1%  |
| Prenner 2010      | 220   | 6.9      | 1.5    | 209    | 8.0       | 1.5     | -13.6 | -0.72 | -0.92 | -0.53 | -7.23  | 0.000 | 16.6%  |
| Anolik 2008       | 166   | 9.4      | 4.2    | 165    | 11.9      | 4.2     | -21.0 | -0.59 | -0.81 | -0.37 | -5.29  | 0.000 | 13.0%  |
| TOTAL N           | 2549  |          |        |        |           |         |       | -0.55 | -0.63 | -0.47 | -13.64 | 0.000 | Fixed  |
|                   |       |          |        |        |           |         |       | -0.54 | -0.74 | -0.34 | -5.37  | 0.000 | Random |

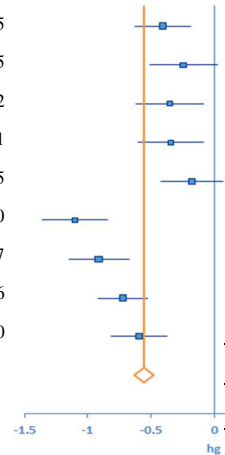

|                   |        |
|-------------------|--------|
| Q                 | 48.581 |
| p                 | 0.000  |
| I <sup>2</sup>    | 83.53% |
| weighted mean RCI | -23.5  |
